# Supplementary material
Source: ML conference proceedings conference paper supplement (https://proceedings.neurips.cc/paper_files/paper/2012/hash/d58072be2820e8682c0a27c0518e805e-Abstract.html)
Supplement: Supplementary file 1 [file d58072be2820e8682c0a27c0518e805e-Supplemental.zip]

Archive with 1 entries (1 files):
- NIPS2012_0806_SupplementaryMaterial.pdf
